# Supplementary material for: High frequency of M. leprae DNA detection in asymptomatic household contacts
Source: PubMed Central journal article supplement (PMC5879567; doi:10.1186/s12879-018-3056-2), 2018-04-02
Supplement: 12879_2018_3056_MOESM1_ESM.pdf [file 12879_2018_3056_MOESM1_ESM.pdf]

| ID  | Categorization | Ct of Blood sanmple | Ct of Blood sanmple | Mean         | Ct of Dermal scraped | Ct of Dermal scraped | Mean               |
|-----|----------------|---------------------|---------------------|--------------|----------------------|----------------------|--------------------|
| 112 | CPB            | Neg.                | Neg.                |              | Neg.                 | Neg.                 |                    |
| 113 | CPB            | Neg.                | Neg.                |              | Neg.                 | Neg.                 |                    |
| 137 | CPB            | Neg.                | <b>35,42</b>        | <b>35,42</b> | Neg.                 | Neg.                 |                    |
| 138 | CPB            | Neg.                | Neg.                |              |                      |                      |                    |
| 139 | CPB            | Neg.                | Neg.                |              |                      |                      |                    |
| 148 | CPB            | Neg.                | Neg.                |              | Neg.                 | Neg.                 |                    |
| 149 | CPB            | Neg.                | Neg.                |              | Neg.                 | Neg.                 |                    |
| 126 | CPB            | Neg.                | Neg.                |              | Neg.                 | Neg.                 |                    |
| 127 | CPB            | Neg.                | Neg.                |              | Neg.                 | Neg.                 |                    |
| 146 | CPB            | Neg.                | Neg.                |              | Neg.                 | Neg.                 |                    |
| 147 | CPB            | Neg.                | Neg.                |              | Neg.                 | Neg.                 |                    |
| 153 | CPB            | Neg.                | Neg.                |              | Neg.                 | Neg.                 |                    |
| 2   | CPB            |                     |                     |              | Neg.                 | Neg.                 |                    |
| 3   | CPB            |                     |                     |              | Neg.                 | Neg.                 |                    |
| 5   | CPB            |                     |                     |              | Neg.                 | Neg.                 |                    |
| 10  | CPB            | Neg.                | Neg.                |              | Neg.                 | Neg.                 |                    |
| 18  | CPB            | Neg.                | Neg.                |              | Neg.                 | Neg.                 |                    |
| 37  | CPB            | Neg.                | Neg.                |              |                      |                      |                    |
| 38  | CPB            | Neg.                | Neg.                |              | Neg.                 | Neg.                 |                    |
| 39  | CPB            | Neg.                | Neg.                |              | Neg.                 | Neg.                 |                    |
| 40  | CPB            | Neg.                | Neg.                |              | Neg.                 | <b>35,95417404</b>   | <b>35,95417404</b> |
| 42  | CPB            | Neg.                | Neg.                |              | Neg.                 | Neg.                 |                    |
| 46  | CPB            | Neg.                | Neg.                |              | Neg.                 | Neg.                 |                    |
| 47  | CPB            | Neg.                | Neg.                |              | Neg.                 | Neg.                 |                    |
| 49  | CPB            | Neg.                | Neg.                |              | <b>35,33840179</b>   | <b>35,45843506</b>   | <b>35,39841843</b> |
| 51  | CPB            | Neg.                | Neg.                |              | Neg.                 | Neg.                 |                    |
| 61  | CPB            | Neg.                | Neg.                |              | Neg.                 | Neg.                 |                    |

|     |     |                 |                 |                 |                    |                    |                    |
|-----|-----|-----------------|-----------------|-----------------|--------------------|--------------------|--------------------|
| 62  | CPB | Neg.            | Neg.            |                 | Neg.               | Neg.               |                    |
| 63  | CPB | Neg.            | <b>37,07093</b> | <b>37,07093</b> | Neg.               | Neg.               |                    |
| 64  | CPB | Neg.            | Neg.            |                 | Neg.               | Neg.               |                    |
| 71  | CPB | Neg.            | Neg.            |                 | Neg.               | Neg.               |                    |
| 79  | CPB | Neg.            | Neg.            |                 |                    |                    |                    |
| 80  | CPB | Neg.            | Neg.            |                 | Neg.               | Neg.               |                    |
| 85  | CPB | Neg.            | Neg.            |                 | Neg.               | Neg.               |                    |
| 86  | CPB | Neg.            | Neg.            |                 | Neg.               | <b>37,01305008</b> | <b>37,01305008</b> |
| 87  | CPB | Neg.            | Neg.            |                 | Neg.               | Neg.               |                    |
| 90  | CPB | Neg.            | Neg.            |                 | <b>35,34076691</b> | <b>35,75477219</b> | <b>35,54776764</b> |
| 91  | CPB | Neg.            | Neg.            |                 | Neg.               | Neg.               |                    |
| 93  | CPB | Neg.            | Neg.            |                 | Neg.               | Neg.               |                    |
| 94  | CPB | Neg.            | Neg.            |                 | Neg.               | Neg.               |                    |
| 95  | CPB | Neg.            | Neg.            |                 | <b>27,8194809</b>  | Neg.               | <b>27,8194809</b>  |
| 96  | CPB | Neg.            | Neg.            |                 | Neg.               | Neg.               |                    |
| 109 | CPB | <b>37,0754</b>  | Neg.            | <b>37,0754</b>  | Neg.               | Neg.               |                    |
| 134 | CPB | Neg.            | <b>35,34</b>    | <b>35,34</b>    | <b>37,62</b>       | <b>38,66</b>       | <b>38,14</b>       |
| 140 | CPB | Neg.            | Neg.            |                 | Neg.               | Neg.               |                    |
| 141 | CPB | Neg.            | Neg.            |                 | Neg.               | Neg.               |                    |
| 142 | CPB | Neg.            | Neg.            |                 | Neg.               | Neg.               |                    |
| 143 | CPB | Neg.            | Neg.            |                 | Neg.               | Neg.               |                    |
| 151 | CPB | Neg.            | Neg.            |                 | <b>36,86</b>       | Neg.               | <b>36,86</b>       |
| 152 | CPB | Neg.            | Neg.            |                 | Neg.               | Neg.               |                    |
| 157 | CPB | Neg.            | Neg.            |                 | Neg.               | Neg.               |                    |
| 158 | CPB | Neg.            | Neg.            |                 | Neg.               | Neg.               |                    |
| 22  | CMB | Neg.            | Neg.            |                 | Neg.               | Neg.               |                    |
| 23  | CMB | <b>35,63187</b> | <b>35,29959</b> | <b>35,46573</b> | <b>37,03517914</b> | Neg.               | <b>37,03517914</b> |
| 31  | CMB | Neg.            | Neg.            |                 | <b>33,72317123</b> | Neg.               | <b>33,72317123</b> |
| 32  | CMB | Neg.            | Neg.            |                 | <b>26,92251968</b> | Neg.               | <b>26,92251968</b> |
| 35  | CMB | <b>34,97571</b> | <b>34,56522</b> | <b>34,77047</b> | Neg.               | Neg.               |                    |
| 36  | CMB | Neg.            | Neg.            |                 | Neg.               | Neg.               |                    |
| 54  | CMB | Neg.            | Neg.            |                 | Neg.               | Neg.               |                    |
| 57  | CMB | Neg.            | Neg.            |                 | Neg.               | Neg.               |                    |
| 59  | CMB | Neg.            | Neg.            |                 | Neg.               | Neg.               |                    |

|     |     |                 |                 |                 |                    |                    |                    |
|-----|-----|-----------------|-----------------|-----------------|--------------------|--------------------|--------------------|
| 60  | CMB | Neg.            | <b>36,87008</b> | <b>36,87008</b> | Neg.               | Neg.               |                    |
| 81  | CMB | Neg.            | Neg.            |                 | Neg.               | Neg.               |                    |
| 82  | CMB | Neg.            | Neg.            |                 | Neg.               | Neg.               |                    |
| 118 | CMB | Neg.            | Neg.            |                 | Neg.               | Neg.               |                    |
| 119 | CMB | Neg.            | Neg.            |                 |                    |                    |                    |
| 120 | CMB | Neg.            | Neg.            |                 | Neg.               | Neg.               |                    |
| 136 | CMB | Neg.            | <b>37,28</b>    | <b>37,28</b>    | Neg.               | Neg.               |                    |
| 145 | CMB | Neg.            | Neg.            |                 | Neg.               | Neg.               |                    |
| 154 | CMB | Neg.            | Neg.            |                 |                    |                    |                    |
| 155 | CMB | Neg.            | Neg.            |                 | Neg.               | Neg.               |                    |
| 128 | CMB | Neg.            | Neg.            |                 | Neg.               | <b>35,56</b>       | <b>35,56</b>       |
| 129 | CMB | Neg.            | Neg.            |                 | Neg.               | Neg.               |                    |
| 130 | CMB | Neg.            | Neg.            |                 | <b>36,34</b>       | Neg.               | <b>36,34</b>       |
| 56  | CMB |                 |                 |                 | Neg.               | Neg.               |                    |
| 28  | CMB | Neg.            | Neg.            |                 | Neg.               | <b>34,9833107</b>  | <b>34,9833107</b>  |
| 33  | CMB | Neg.            | Neg.            |                 | Neg.               | Neg.               |                    |
| 75  | CMB | Neg.            | Neg.            |                 | Neg.               | Neg.               |                    |
| 76  | CMB | Neg.            | Neg.            |                 |                    |                    |                    |
| 98  | CMB | Neg.            | Neg.            |                 | Neg.               | Neg.               |                    |
| 99  | CMB | Neg.            | Neg.            |                 | Neg.               | <b>32,70974731</b> | <b>32,70974731</b> |
| 100 | CMB | Neg.            | Neg.            |                 | Neg.               | Neg.               |                    |
| 101 | CMB | Neg.            | Neg.            |                 | Neg.               | Neg.               |                    |
| 108 | CMB | Neg.            | Neg.            |                 | Neg.               | Neg.               |                    |
| 114 | CMB | Neg.            | Neg.            |                 | Neg.               | Neg.               |                    |
| 115 | CMB | Neg.            | Neg.            |                 | Neg.               | Neg.               |                    |
| 8   | CMB | Neg.            | Neg.            |                 | Neg.               | Neg.               |                    |
| 9   | CMB | Neg.            | Neg.            |                 | Neg.               | Neg.               |                    |
| 12  | CMB | Neg.            | Neg.            |                 | Neg.               | Neg.               |                    |
| 13  | CMB | Neg.            | Neg.            |                 |                    |                    |                    |
| 14  | CMB | Neg.            | Neg.            |                 | Neg.               | Neg.               |                    |
| 15  | CMB | Neg.            | Neg.            |                 |                    |                    |                    |
| 16  | CMB | Neg.            | Neg.            |                 | <b>33,52672195</b> | Neg.               | <b>33,52672195</b> |
| 19  | CMB | Neg.            | Neg.            |                 | Neg.               | Neg.               |                    |
| 66  | CMB | <b>36,97926</b> | Neg.            | <b>36,97926</b> | Neg.               | Neg.               |                    |

|     |     |                 |                 |                 |                    |                    |                    |
|-----|-----|-----------------|-----------------|-----------------|--------------------|--------------------|--------------------|
| 67  | CMB | <b>34,57853</b> | <b>34,08636</b> | <b>34,33245</b> | Neg.               | Neg.               |                    |
| 68  | CMB | Neg.            | Neg.            |                 | <b>34,75926971</b> | <b>34,26903915</b> | <b>34,51415253</b> |
| 69  | CMB | Neg.            | Neg.            |                 | <b>36,04762268</b> | <b>34,26330566</b> | <b>35,15546417</b> |
| 89  | CMB | Neg.            | Neg.            |                 | Neg.               | Neg.               |                    |
| 102 | CMB | Neg.            | Neg.            |                 | Neg.               | Neg.               |                    |
| 103 | CMB | Neg.            | Neg.            |                 | Neg.               | Neg.               |                    |
| 104 | CMB | Neg.            | Neg.            |                 | Neg.               | <b>36,48492432</b> | <b>36,48492432</b> |
| 105 | CMB | Neg.            | Neg.            |                 | Neg.               | Neg.               |                    |
| 106 | CMB | Neg.            | Neg.            |                 | Neg.               | Neg.               |                    |
| 107 | CMB | <b>34,06751</b> | <b>33,23258</b> | <b>33,65005</b> | Neg.               | Neg.               |                    |
| 135 | CMB | Neg.            | Neg.            |                 | Neg.               | Neg.               |                    |
| 144 | CMB | Neg.            | Neg.            |                 | Neg.               | Neg.               |                    |
| 156 | CMB | Neg.            | Neg.            |                 | Neg.               | Neg.               |                    |
| 121 | CMB | Neg.            | Neg.            |                 | Neg.               | Neg.               |                    |
| 122 | CMB | Neg.            | Neg.            |                 | Neg.               | Neg.               |                    |
| 123 | CMB | Neg.            | Neg.            |                 | Neg.               | Neg.               |                    |
| 124 | CMB | Neg.            | Neg.            |                 |                    |                    |                    |
| 125 | CMB | Neg.            | Neg.            |                 | Neg.               | Neg.               |                    |
